# Supplementary material
Source: Research Square preprint supplement (doi:10.21203/rs.3.rs-8562930/v1)
Supplement: Supplementary file 1 [file 360d308978270e67636018dd.xlsx]

## Sheet: MP in water microscopy
Station	Replica	Number	Fragment	Fiber	Fragment				Fiber				Color
					1-5mm	0.5-1mm	0.1-0.5mm	< 0.1mm	1-5mm	0.5-1mm	0.1-0.5mm	< 0.1mm	Black	Blue	Red	Green	Grey	Transparent	Brown
1	A	0	0	0	0	0	0	0	0	0	0	0	0	0	0	0	0	0	0
1	B	0	0	0	0	0	0	0	0	0	0	0	0	0	0	0	0	0	0
1	C	2	1	1	0	0	1	0	0	1	0	0	1	1	0	0	0	0	0
2	A	1	0	1	0	0	0	0	0	0	1	0	1	0	0	0	0	0	0
2	B	2	0	2	0	0	0	0	0	2	0	0	0	2	0	0	0	0	0
2	C	4	1	3	0	0	1	0	3	0	0	0	0	3	1	0	0	0	0
3	A	13	0	13	0	0	0	0	6	5	2	0	2	7	0	1	3	0	0
3	B	7	1	6	0	0	1	0	5	0	1	0	0	6	1	0	0	0	0
3	C	2	0	2	0	0	0	0	0	2	0	0	0	2	0	0	0	0	0
4	A	8	3	5	0	1	2	0	3	1	1	0	3	3	2	0	0	0	0
4	B	2	0	2	0	0	0	0	1	0	1	0	0	2	0	0	0	0	0
4	C	5	1	4	0	0	1	0	2	2	0	0	0	1	1	0	3	0	0
5	A	3	0	3	0	0	0	0	1	2	0	0	0	2	0	0	1	0	0
5	B	0	0	0	0	0	0	0	0	0	0	0	0	0	0	0	0	0	0
5	C	5	0	5	0	0	0	0	1	0	4	0	0	5	0	0	0	0	0
6	A	6	2	4	0	0	1	1	2	1	1	0	0	2	2	0	2	0	0
6	B	7	1	6	1	0	0	0	6	0	0	0	0	6	0	0	1	0	0
6	C	1	0	1	0	0	0	0	0	1	0	0	0	0	0	0	1	0	0
7	A	2	1	1	0	0	1	0	1	0	0	0	1	1	0	0	0	0	0
7	B	2	0	2	0	0	0	0	0	1	1	0	0	2	0	0	0	0	0
7	C	2	0	2	0	0	0	0	1	1	0	0	0	2	0	0	0	0	0
8	A	1	1	0	0	0	0	1	0	0	0	0	0	1	0	0	0	0	0
8	B	4	1	3	0	0	0	1	1	2	0	0	1	2	0	0	1	0	0
8	C	6	1	5	0	0	1	0	3	1	1	0	0	4	1	0	1	0	0
9	A	4	1	3	0	1	0	0	3	0	0	0	2	1	0	1	0	0	0
9	B	4	1	3	0	0	1	0	1	0	2	0	0	1	2	0	1	0	0
9	C	0	0	0	0	0	0	0	0	0	0	0	0	0	0	0	0	0	0
10	A	2	1	1	0	0	1	0	1	0	0	0	0	2	0	0	0	0	0
10	B	3	0	3	0	0	0	0	3	0	0	0	1	2	0	0	0	0	0
10	C	3	0	3	0	0	0	0	2	0	1	0	1	2	0	0	0	0	0
11	A	4	0	4	0	0	0	0	1	2	1	0	0	4	0	0	0	0	0
11	B	1	0	1	0	0	0	0	1	0	0	0	0	1	0	0	0	0	0
11	C	0	0	0	0	0	0	0	0	0	0	0	0	0	0	0	0	0	0
12	A	14	1	13	0	0	1	0	3	8	2	0	2	11	1	0	0	0	0
12	B	1	0	1	0	0	0	0	0	1	0	0	0	1	0	0	0	0	0
12	C	8	3	5	0	0	0	3	0	4	1	0	0	6	0	2	0	0	0
13	A	6	1	5	0	0	0	1	3	2	0	0	1	5	0	0	0	0	0
13	B	6	0	6	0	0	0	0	6	0	0	0	0	5	0	0	1	0	0
13	C	16	0	16	0	0	0	0	10	4	2	0	1	13	0	0	2	0	0
14	A	5	0	5	0	0	0	0	3	1	1	0	0	5	0	0	0	0	0
14	B	16	1	15	0	0	0	1	8	7	0	0	1	10	1	1	2	0	1
14	C	1	0	1	0	0	0	0	0	1	0	0	0	1	0	0	0	0	0
15	A	4	0	4	0	0	0	0	4	0	0	0	0	4	0	0	0	0	0
15	B	0	0	0	0	0	0	0	0	0	0	0	0	0	0	0	0	0	0
15	C	2	0	2	0	0	0	0	1	1	0	0	0	0	1	0	1	0	0
16	A	2	0	2	0	0	0	0	1	1	0	0	0	1	1	0	0	0	0
16	B	0	0	0	0	0	0	0	0	0	0	0	0	0	0	0	0	0	0
16	C	0	0	0	0	0	0	0	0	0	0	0	0	0	0	0	0	0	0
17	A	0	0	0	0	0	0	0	0	0	0	0	0	0	0	0	0	0	0
17	B	2	0	2	0	0	0	0	0	2	0	0	0	0	2	0	0	0	0
17	C	1	0	1	0	0	0	0	0	1	0	0	0	1	0	0	0	0	0
18	A	3	0	3	0	0	0	0	2	1	0	0	0	2	0	0	0	0	1
18	B	8	5	3	0	0	1	4	2	0	0	1	0	5	2	0	1	0	0
18	C	4	0	4	0	0	0	0	2	1	1	0	0	2	0	0	1	0	1
19	A	4	2	2	0	0	0	2	1	1	0	0	0	4	0	0	0	0	0
18	B	0	0	0	0	0	0	0	0	0	0	0	0	0	0	0	0	0	0
19	C	8	3	5	0	0	0	3	1	3	1	0	2	6	0	0	0	0	0
20	A	38	0	38	0	0	0	0	26	11	1	0	4	17	4	9	4	0	0
20	B	31	1	30	0	0	0	1	19	10	1	0	4	19	2	5	1	0	0
20	C	55	0	55	0	0	0	0	36	17	2	0	18	22	8	0	6	0	1

## Sheet: MP in sediment microscopy
Station	Replica	Number	Fragment	Fiber	Fragment				Fiber				Color
					1-5mm	0.5-1mm	0.1-0.5mm	< 0.1mm	1-5mm	0.5-1mm	0.1-0.5mm	< 0.1mm	Black	Blue	Red	Green	Grey	Transparent	Brown
1	A	9	1	8	0	1	0	0	5	3	0	0	5	3	0	0	0	1	0
1	B	1	0	1	0	0	0	0	0	1	0	0	1	0	0	0	0	0	0
1	C	5	0	5	0	0	0	0	4	0	1	0	1	4	0	0	0	0	0
2	A	4	1	3	0	0	1	0	2	1	0	0	0	3	0	0	0	1	0
2	B	1	0	1	0	0	0	0	1	0	0	0	0	0	0	0	0	1	0
2	C	3	0	3	0	0	0	0	1	1	1	0	1	1	0	0	1	0	0
3	A	0	0	0	0	0	0	0	0	0	0	0	0	0	0	0	0	0	0
3	B	5	1	4	0	1	0	0	3	1	0	0	2	1	1	0	0	1	0
3	C	2	0	2	0	0	0	0	1	1	0	0	0	2	0	0	0	0	0
4	A	5	1	4	0	0	1	0	1	2	1	0	0	3	2	0	0	0	0
4	B	3	2	1	0	0	2	0	1	0	0	0	1	2	0	0	0	0	0
4	C	6	0	6	0	0	0	0	3	3	0	0	1	2	1	0	0	1	1
5	A	14	1	13	0	0	1	0	4	7	2	0	6	2	2	0	2	2	0
5	B	7	0	7	0	0	0	0	7	0	0	0	1	5	0	0	0	1	0
5	C	10	1	9	0	1	0	0	7	2	0	0	3	2	0	0	0	5	0
6	A	6	2	4	0	0	2	0	3	1	0	0	2	2	2	0	0	0	0
6	B	4	0	4	0	0	0	0	2	2	0	0	1	3	0	0	0	0	0
6	C	3	0	3	0	0	0	0	2	0	1	0	1	1	0	0	0	1	0
7	A	2	0	2	0	0	0	0	1	0	1	0	0	1	0	0	0	1	0
7	B	8	1	8	0	0	1	0	3	5	0	0	2	5	1	0	0	0	0
7	C	5	0	5	0	0	0	0	4	0	1	0	0	5	0	0	0	0	0
8	A	5	0	5	0	0	0	0	3	2	0	0	2	1	0	0	0	2	0
8	B	4	0	4	0	0	0	0	4	0	0	0	2	2	0	0	0	0	0
8	C	2	0	2	0	0	0	0	1	0	1	0	0	2	0	0	0	0	0
9	A	10	0	10	0	0	0	0	7	3	0	0	5	3	0	0	1	1	0
9	B	3	0	3	0	0	0	0	3	0	0	0	0	3	0	0	0	0	0
9	C	3	0	3	0	0	0	0	1	2	0	0	1	1	0	0	0	1	0
10	A	6	0	6	0	0	0	0	3	1	2	0	0	6	0	0	0	0	0
10	B	5	1	4	0	0	1	0	3	1	0	0	1	4	0	0	0	1	0
10	C	3	0	3	0	0	0	0	0	3	0	0	3	0	0	0	0	0	0
11	A	4	0	4	0	0	0	0	2	0	2	0	0	2	1	0	0	1	0
11	B	7	0	7	0	0	0	0	4	2	1	0	1	5	0	0	1	0	0
11	C	3	0	3	0	0	0	0	1	2	0	0	2	1	0	0	0	0	0
12	A	3	0	3	0	0	0	0	2	1	0	0	1	2	0	0	0	0	0
12	B	14	1	13	0	0	1	0	7	5	1	0	7	5	2	0	0	0	0
12	C	7	0	7	0	0	0	0	4	2	1	0	4	3	0	0	0	0	0
13	A	8	1	7	0	0	1	0	4	2	1	0	1	5	1	0	1	0	0
13	B	3	0	3	0	0	0	0	0	3	0	0	2	1	0	0	0	0	0
13	C	7	1	6	0	0	1	0	4	2	0	0	1	5	0	0	1	0	0
14	A	4	0	4	0	0	0	0	3	1	0	0	2	1	0	0	1	0	0
14	B	2	0	2	0	0	0	0	2	0	0	0	1	1	0	0	0	0	0
14	C	0	0	0	0	0	0	0	0	0	0	0	0	0	0	0	0	0	0
15	A	8	1	7	0	0	0	1	3	2	2	0	1	3	2	0	1	0	1
15	B	9	0	9	0	0	0	0	3	3	3	0	1	4	1	0	3	0	0
15	C	11	1	10	0	0	1	0	7	2	1	0	5	5	0	0	0	0	1
16	A	12	0	12	0	0	0	0	8	4	0	0	4	7	0	0	0	1	0
16	B	5	1	4	0	1	0	0	3	1	0	0	1	4	0	0	0	0	0
16	C	2	0	2	0	0	0	0	2	0	0	0	1	0	0	0	0	1	0
17	A	15	1	14	0	0	1	0	8	5	1	0	5	7	0	0	2	1	0
17	B	4	1	3	0	1	0	0	2	1	0	0	0	2	0	1	1	0	0
17	C	4	0	4	0	0	0	0	2	1	1	0	0	4	0	0	0	0	0
18	A	12	1	11	0	0	1	0	7	4	0	0	3	5	0	0	0	4	0
18	B	12	1	11	0	0	1	0	7	4	0	0	5	3	4	0	0	0	0
18	C	85	0	85	0	0	0	0	48	25	12	0	29	42	7	0	2	5	0
19	A	3	0	3	0	0	0	0	2	1	0	0	1	2	0	0	0	0	0
19	B	4	1	3	0	0	1	0	1	2	0	0	0	3	1	0	0	0	0
19	C	5	0	5	0	0	0	0	3	1	1	0	3	2	0	0	0	0	0
20	A	5	1	4	0	0	1	0	3	1	0	0	3	2	0	0	0	0	0
20	B	1	0	1	0	0	0	0	1	0	0	0	0	1	0	0	0	0	0
20	C	14	1	13	0	0	1	0	6	6	1	0	5	8	1	0	0	0	0

## Sheet: MP in sediment µ-FTIR
Station	Replica	Number	Microplastic							Polymer type
			1-5mm	0.50-1mm	0.30-0.50mm	0.15-0.30mm	0.10-0.15mm	0.05-0.10mm	0.025-0.050mm	PP	PE	PS	PET	PVC	PA	PU	Acrylic
1	NA	NA	NA	NA	NA	NA	NA	NA	NA	NA	NA	NA	NA	NA	NA	NA	NA
2	A	7	0	0	1	1	2	3	0	0	6	0	0	0	1	0	0
3	A	30	0	4	2	17	5	2	0	18	6	2	0	0	1	1	2
4	A	8	0	0	1	1	2	4	0	3	5	0	0	0	0	0	0
5	A	14	1	0	0	6	7	0	0	4	10	0	0	0	0	0	0
6	A	2	0	0	0	2	0	0	0	0	2	0	0	0	0	0	0
7	A	2	0	0	0	1	0	1	0	1	1	0	0	0	0	0	0
8	A	10	0	0	1	2	4	3	0	1	7	0	1	0	1	0	0
9	A	23	0	1	2	3	7	9	1	10	12	1	0	0	0	0	0
10	A	17	0	0	1	5	6	5	0	4	12	0	0	0	1	0	0
11	A	0	0	0	0	0	0	0	0	0	0	0	0	0	0	0	0
11	B	21	1	0	0	5	6	9	0	8	4	1	3	3	1	0	1
12	A	21	0	1	1	6	7	6	0	3	17	1	0	0	0	0	0
13	A	25	0	0	1	4	11	9	0	0	20	1	3	0	1	0	0
14	A	10	0	0	1	1	3	5	0	1	6	1	1	0	1	0	0
15	A	27	0	0	0	2	9	15	1	0	25	1	0	0	1	0	0
16	A	47	0	0	0	8	15	24	0	6	37	0	3	0	1	0	0
17	A	10	0	1	0	1	3	5	0	1	5	0	3	0	1	0	0
18	A	11	0	0	0	0	2	9	0	3	2	1	1	0	4	0	0
19	A	7	0	0	0	1	1	5	0	1	6	0	0	0	0	0	0
19	B	2	0	0	0	0	0	2	0	1	0	0	0	0	0	0	1
20	A	1	0	0	0	0	1	0	0	0	1	0	0	0	0	0	0
20	B	8	0	0	0	1	2	5	0	6	0	1	0	1	0	0	0

## Sheet: TOC & Grain size sediment
Station	TOC (%)	Grain size
		Clay (0-2 µm; %)	Silt (2-63 µm; %)	Sand (63-2000 µm; %)	Gravel (2000-5000 µm; %)
1	9.0093	0.05	33.29	66.66	0
2	1.38845	0.0133333	21.6967	69.9067	8.38333
3	1.76583	0.933333	41.1667	57.2533	0.646667
4	0.349372	0	4.06333	92.74	3.19667
5	1.46955	0	4.325	84.485	11.19
6	0.513	0.275	20.16	66.4	13.165
7	0.178	0	0	82	18
8	0.129	0	2.22	88.98	8.8
9	0.253	0	6.53	79.59	13.88
10	0.04	0	0	96.12	3.88
11	0.628	0.01	8.785	90.155	1.05
12	0.144	0	3.555	95.365	1.08
13	0.314	0	0	73.71	26.29
14	0.092	0	5.11	90.57	4.32
15	0.01	0	2.84	93.43	3.73
16	0.049	0	0.365	99.635	0
17	0.02	0	2.095	90.44	7.465
18	0.01	0	0	81.55	18.45
19	0.29	0	2.07	97.92	0.01
20	3.09445	3.655	88.545	7.675	0
